# Supplementary material
Source: MDPI journal article supplement (https://www.mdpi.com/2073-4441/15/12/2290)
Supplement: s1 [file s1]

## Supporting Information

# Adsorption-Reduction of Cr(VI) with Magnetic Fe-C-N Composites

Xu Liu <sup>1,2,†</sup>, Huilai Liu <sup>1,2,†</sup>, Kangping Cui <sup>1</sup>, Zhengliang Dai <sup>3</sup>, Bei Wang <sup>3</sup>, Rohan Weerasooriya <sup>2,4</sup> and Xing Chen <sup>1,2,\*</sup>

<sup>1</sup> Key Laboratory of Nanominerals and Pollution Control of Higher Education Institutes, School of Resources and Environmental Engineering, Hefei University of Technology, Hefei 230009, China; akira0519@sina.com (X.L.); liuhuilai1996@163.com (H.L.); cui kangping@hfut.edu.cn (K.C.)

<sup>2</sup> Key Laboratory of Aerospace Structural Parts Forming Technology and Equipment of Anhui Province, Institute of Industry and Equipment Technology, Hefei University of Technology, Hefei 230009, China; rohan.we@nifs.ac.lk

<sup>3</sup> Anqing Changhong Chemical Co., Ltd., Anqing 246002, China; zl\_dai@163.com (Z.D.); 13855694589@163.com (B.W.)

<sup>4</sup> National Centre for Water Quality Research, National Institute of Fundamental Studies, Hantana, Kandy 20000, Sri Lanka

\* Correspondence: xingchen@hfut.edu.cn; Tel./Fax: +86-551-62902634

† These authors contributed equally to this work.

## Outlines:

**Figure S1.** Elemental mapping images of the FCN-0.

**Figure S2.** N<sub>2</sub> adsorption-desorption isotherms of FCN-0, FCN-400, FCN-500, and FCN-600, with corresponding pore size distribution embedded in.

**Figure S3.** Adsorption capacities of adsorbents for Cr(VI). (a) Effect of different adsorbents ( $T = 35\text{ }^{\circ}\text{C}$ ,  $\text{pH} = 2$ ,  $[\text{Cr(VI)}] = 30\text{ mg/L}$ ,  $[\text{Adsorbents}] = 0.8\text{ g/L}$ ). (b) Effect of the pH value ( $T = 35\text{ }^{\circ}\text{C}$ ,  $[\text{Cr(VI)}] = 30\text{ mg/L}$ ,  $[\text{FCN-500}] = 0.8\text{ g/L}$ ). (c) Effect of the temperature ( $\text{pH} = 2$ ,  $[\text{Cr(VI)}] = 30\text{ mg/L}$ ,  $[\text{FCN-500}] = 0.8\text{ g/L}$ ). (d) Effect of the initial Cr(VI) concentration ( $T = 35\text{ }^{\circ}\text{C}$ ,  $\text{pH} = 2$ ,  $[\text{FCN-500}] = 0.8\text{ g/L}$ ).

**Figure S4.** Langmuir, and Freundlich isotherm for the adsorption of Cr(VI) by FCN-500 ( $T = 308\text{ K}$ ,  $\text{pH} = 2$ ,  $[\text{FCN-500}] = 0.8\text{ g/L}$ ).

**Figure S5.** Cr(VI) removal rate from electroplating wastewater by FCN-500 ( $T = 298\text{ K}$ ,  $\text{pH} = 3$ ,  $C_0 = 117\text{ mg/L}$ ,  $[\text{FCN-500}] = 2.4\text{ g/L}$ ).

**Table S1.** BET specific surface area and pore size distribution.

**Table S2.** Chemical properties of FCN-0, FCN-400, FCN-500, FCN-600.

**Table S3.** The data for ICP-MS analysis of chromium species.

**Table S4.** The Proportion of elements in catalyst before and after reaction

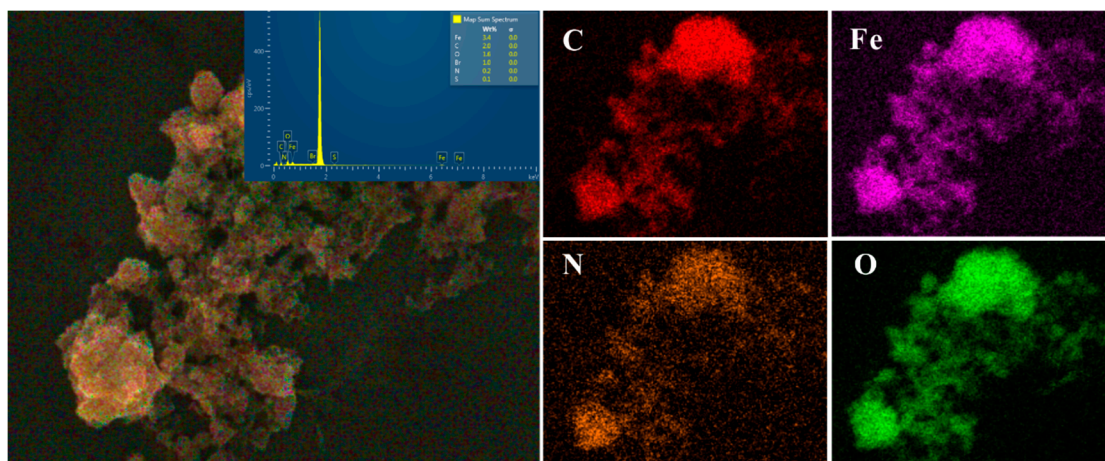

**Figure S1.** Elemental mapping images of the FCN-0.

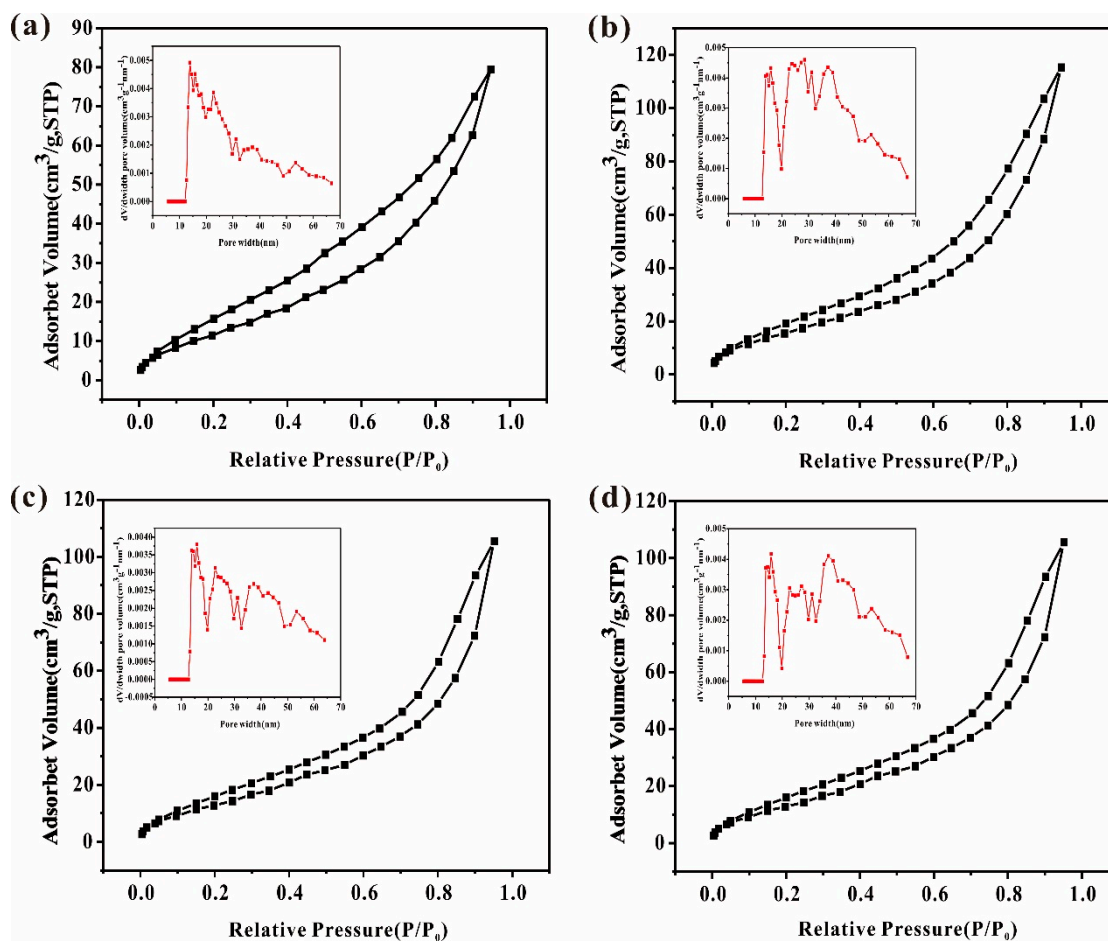

**Figure S2.** N<sub>2</sub> adsorption-desorption isotherms of FCN-0, FCN-400, FCN-500, and FCN-600, with corresponding pore size distribution embedded in.

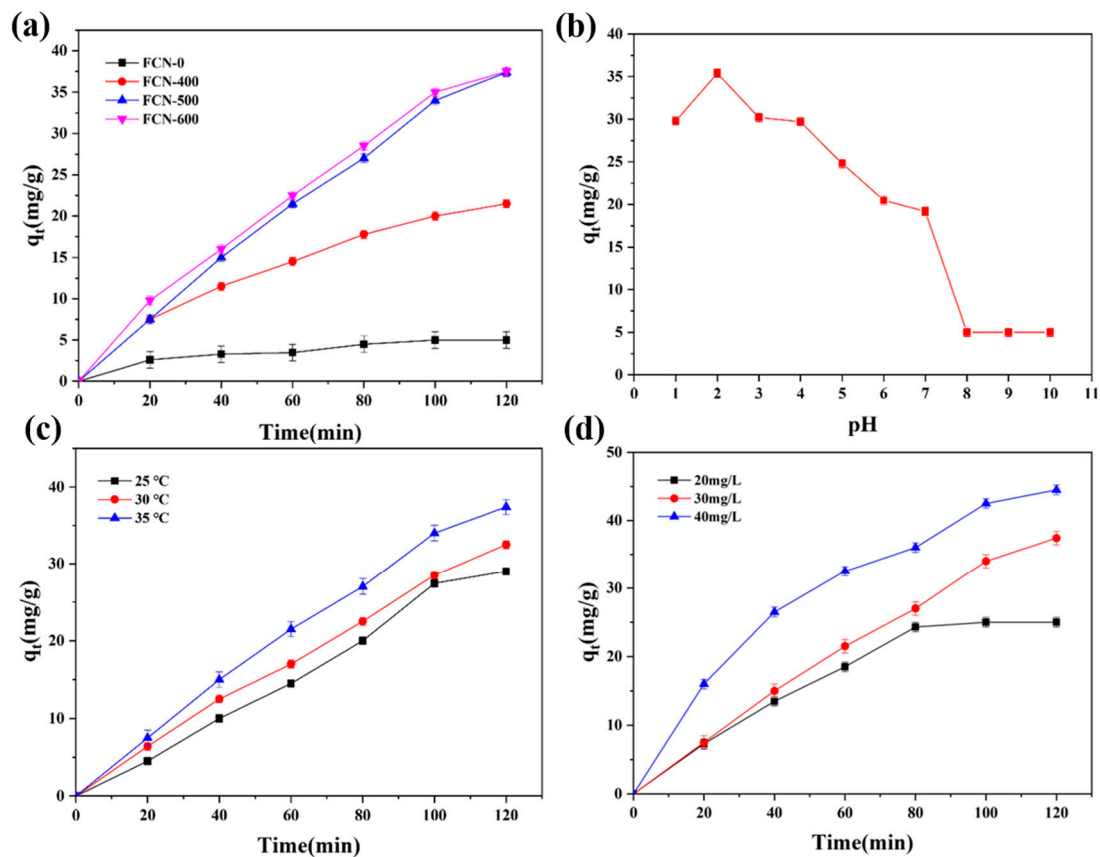

**Figure S3.** Adsorption capacities of adsorbents for Cr(VI). (a) Effect of different adsorbents ( $T = 35\text{ }^{\circ}\text{C}$ ,  $\text{pH} = 2$ ,  $[\text{Cr(VI)}] = 30\text{ mg/L}$ ,  $[\text{Adsorbents}] = 0.8\text{ g/L}$ ). (b) Effect of the pH value ( $T = 35\text{ }^{\circ}\text{C}$ ,  $[\text{Cr(VI)}] = 30\text{ mg/L}$ ,  $[\text{FCN-500}] = 0.8\text{ g/L}$ ). (c) Effect of the temperature ( $\text{pH} = 2$ ,  $[\text{Cr(VI)}] = 30\text{ mg/L}$ ,  $[\text{FCN-500}] = 0.8\text{ g/L}$ ). (d) Effect of the initial Cr(VI) concentration ( $T = 35\text{ }^{\circ}\text{C}$ ,  $\text{pH} = 2$ ,  $[\text{FCN-500}] = 0.8\text{ g/L}$ ).

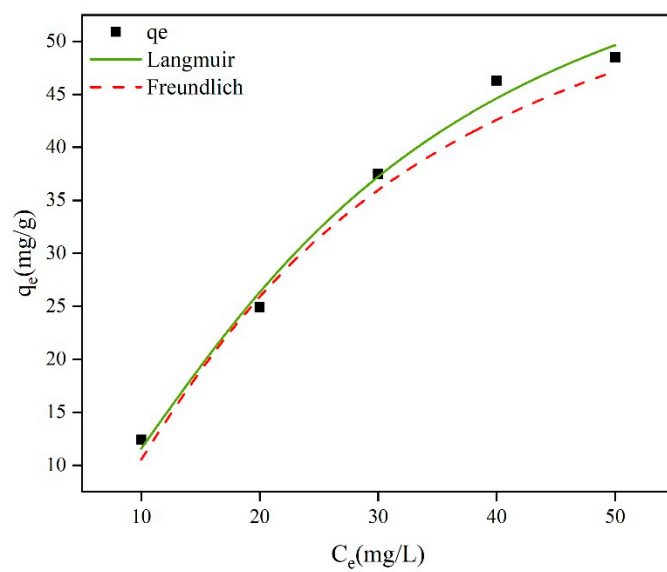

**Figure S4.** Langmuir, and Freundlich isotherm for the adsorption of Cr(VI) by FCN-500 ( $T = 308$  K,  $\text{pH} = 2$ ,  $[\text{FCN-500}] = 0.8$  g/L).

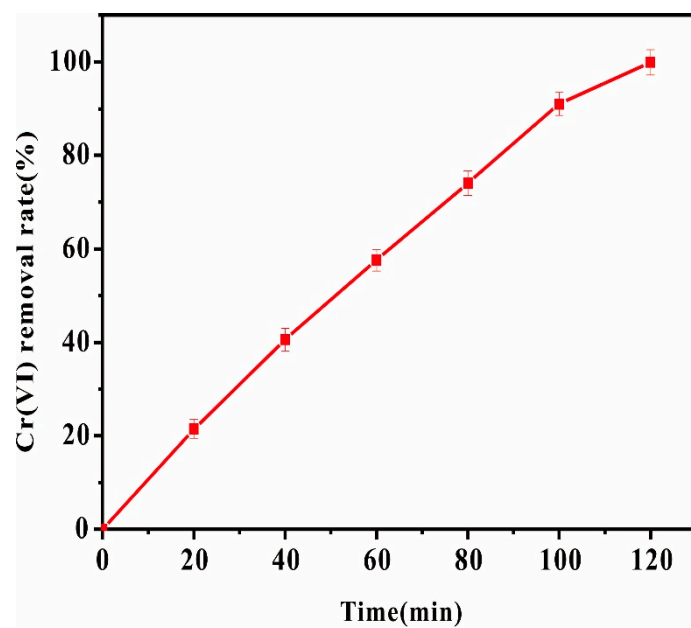

**Figure S5.** Cr(VI) removal rate from electroplating wastewater by FCN-500 ( $T = 298$  K,  $\text{pH} = 3$ ,  $C_0 = 117$  mg/L,  $[\text{FCN-500}] = 2.4$  g/L).

**Table S1.** BET specific surface area and pore size distribution.

| name    | $S_{\text{BET}}/(\text{m}^2/\text{g})$ | $VT/(\text{cm}^3/\text{g})$ | $D/(\text{nm})$ |
|---------|----------------------------------------|-----------------------------|-----------------|
| FCN-0   | 50.43                                  | 0.105                       | 48.78           |
| FCN-400 | 64.93                                  | 0.18                        | 54.98           |
| FCN-500 | 47.77                                  | 0.13                        | 55.29           |
| FCN-600 | 55.63                                  | 0.16                        | 56.65           |

**Table S2.** The chemical properties of FCN-0, FCN-400, FCN-500, FCN-600.

| Metal element | FCN-0<br>(wt) | FCN-400<br>(wt) | FCN-500<br>(wt) | FCN-600<br>(wt) |
|---------------|---------------|-----------------|-----------------|-----------------|
| Fe            | 68.57%        | 73.08%          | 74.01%          | 74.02%          |
| Mn            | 0.63%         | 0.70%           | 0.72%           | 0.70%           |
| Ca            | 0.60%         | 0.73%           | 0.64%           | 0.68%           |
| Na            | 0.23%         | 0.27%           | 0.35%           | 0.42%           |
| Mg            | 0.13%         | 0.18%           | 0.14%           | 0.15%           |
| Cr            | 0.09%         | 0.09%           | 0.09%           | 0.09%           |
| Zn            | 0.08%         | 0.08%           | 0.08%           | 0.08%           |



**Table S3.** The data for ICP-MS analysis of chromium species.

| Element | Before reaction | After reaction |
|---------|-----------------|----------------|
| Cr      | 29.89 ppm       | 3.12 ppb       |

**Table S4.** The Proportion of elements in catalyst before and after reaction

| Element | Before reaction | After reaction |
|---------|-----------------|----------------|
| C       | 41.24%          | 41.73%         |
| N       | 11.22%          | 9.77%          |
| O       | 34.74%          | 34.55%         |
| Fe      | 12.8%           | 12.7%          |
| Cr      | 0               | 1.25%          |
